# Supplementary material for: Application of a Neural Network Whole Transcriptome–Based Pan-Cancer Method for Diagnosis of Primary and Metastatic Cancers
Source: PubMed Central journal article supplement (PMC6487574; doi:10.1001/jamanetworkopen.2019.2597), 2019-04-26
Supplement: jamanetwopen-2-e192597-s001.pdf [file jamanetwopen-2-e192597-s001.pdf]

## Supplementary Online Content

Grewal JK, Tessier-Cloutier B, Jones M, et al. Application of a neural network whole transcriptome–based pan-cancer method for diagnosis of primary and metastatic cancers. *JAMA Netw Open*. 2019;2(4):e192597. doi:10.1001/jamanetworkopen.2019.2597

**eAppendix 1.** Model Selection

**eAppendix 2.** Training Data

**eAppendix 3.** Test Data

**eAppendix 4.** Metrics Used

**eAppendix 5.** Data Pre-processing

**eAppendix 6.** Feature Weight Analysis

**eAppendix 7.** Differences in Performance on Held-out Set for Feature Selection Algorithms

**eTable 1.** Cancer Types and Corresponding Abbreviations Used for Training, and Referenced in Text

**eTable 2.** Breakdown of Cancer Types in the External Metastatic Cohort

**eTable 3.** Architecture and Identifying Names for Each Neural Network That Makes up the SCOPE Ensemble Classifier

**eTable 4.** Important Genes Based on Frequency Analysis of Gene Weights for Each Neural Network in SCOPE

**eTable 5.** Detailed Breakdown of Prediction Trends in the Metastatic Cohort, With Classes of Mispredictions Listed

**eTable 6.** Detailed Version of Table 2, Whereby the Performance of the Smaller Classes Has Been Described in Detail

**eFigure 1.** Performance of Various Models (Distinct Based on Feature Selection and Architecture) on the Held-out Set

**eFigure 2.** Performance of Algorithms on CV Folds During Training

**eFigure 3.** Performance of SCOPE on the Held-out Set

**eFigure 4.** The Performance of Individual Neural Networks on the Held-out Set

**eFigure 5.** t-SNE Plot of Transcriptomic Data in TCGA Training Cohorts

**eFigure 6.** t-SNE Plot of Transcriptomic Data in TCGA Training Cohorts

**eFigure 7.** A Detailed Version of Figure 2A, Whereby the Smaller Classes Are Shown Individually Instead of in Aggregate

**eFigure 8.** The Distribution of Values for Tests of Association Between Classification Accuracy and a) Tumor Content (%), b) Confidence Score, and c) Training Class Size Are Shown

**eFigure 9.** Example Outputs From SCOPE

**eReferences.**

This supplementary material has been provided by the authors to give readers additional information about their work.

## **eAppendix 1. Model Selection**

As the 66 training cohorts had a wide range of representative samples (3-1020), using accuracy as a metric of performance of the classifiers would not necessarily demonstrate the ability of the classifier to discriminate between all 66 output classes. Therefore, the performance of the trained models was evaluated using the F1-score as a measure. The F1-score is the harmonic mean of precision and recall, with 1.0 being the most desirable value (precision and recall of 1.0 for all output categories), and 0 representing a classifier that has 0 precision and 0 recall on all output categories.

### **Algorithmic Model Selection**

Several supervised learning algorithms were evaluated, including a baseline linear comparator discussed below. For the selection of an initial classifier based on the training data, we evaluated the performance of 4 supervised learning methods, namely multi-class support vector machines (SVM), random forests (RF), extra trees ensemble (ET), and an ensemble of neural networks. Figure 1 shows the cross-validation results of the best performing model in each classification algorithm category. The optimal models for these comparators were selected with grid search across a space of model-specific parameters, using 5-CV to identify the best model. Shallow (1 hidden layer) feed-forward neural networks were trained with varying sizes of the hidden layer. In the selection of the optimal parameter set for the neural networks, our search space spanned a range of values for the learning rate and the regularizers (L1 and L2).

SVMs, RFs, and ETs were implemented using the scikit-learn package in python, and training was done on CPU machines. The custom neural nets were defined and trained using the lasagne library[6] in Python, and training was done using NVIDIA GeForce GTX TITAN X GPUs. The F1-Score was used as the main metric of assessment, to account for class imbalances in the training and test sets.

### **Baseline Linear Comparator**

Using pairwise ANOVA, 3000 genes were found to be significantly enriched for distinguishing between the 66 training tissue and cancer types. Cancer samples in the metastatic cohort were evaluated by calculating simple pair-wise spearman correlation for these genes, for every test sample versus the TCGA samples (separated by cancer type). The highest correlated cancer/normal type was chosen as the predicted class by this approach.

### **SCOPE Ensemble Construction**

Firstly, we found that synthetic minority oversampling (SMOTE) [5] resulted in improved classification of rare classes as compared to training with the class imbalanced dataset (eFigure 3).

Secondly, comparison of different data normalizations showed that using rank transformed RPKM-improved classification accuracy for the overall model. Based on these results, we extended the classifier into an ensemble of neural networks combining these data transformation techniques. The additional neural networks were selected using 5-CV. We also observed that each of these 5 machines was better at classifying different classes within the training dataset, reflecting that they have each learnt different (unknown) modalities for classification of the 66 different tissue and cancer types. Based on this observation, we adopted weighted majority voting approach was used to obtain predictions for new samples from the ensemble. This resulted in a re-weighted vector of 66 values from each network. These reweighted predictions were then pooled using a majority-voting approach, providing an averaged probability score and a similarity confidence for each class.

The architecture and details of data pre-processing of each network are as described in eTable 3.

Learning rate was 0.001, with early stopping when validation cost increased for more than 3 epochs, or was stable for 3 continuous epochs. Maximum number of allowed epochs was 1000, thus training went until 1000 epochs or early stopping threshold, whichever came first.

## **eAppendix 2.** Training Data

Multi-platform RNA-Seq data was obtained from The Cancer Genome Atlas (TCGA, multi-platform - Illumina Hi-Seq 2000 and Genome Analyzer II, processed with TCGA RNA-Seq v2 RSEM processing pipeline), the National Cancer Institute (NCI) non-Hodgkin lymphoma dataset [1] (sequenced with Illumina Genome Analyzer II, median normalized), and non- cell-line primary tumor data from the Terry Fox Research Institutes Glioblastoma Multiforme (TFRI-GBM) project. 2 in-house cancer cohorts, adult medulloblastoma (MB-Adult) and follicular lymphoma (FL), further supplemented this dataset (sequenced with Illumina HiSeq 2500). Colon and rectum adenocarcinomas from TCGA were combined into a single cohort (COADREAD) due to their geographical proximity in primary lesions, supported by findings from our initial quality control that showed insufficient decomposition of these two cancer types based on their transcriptomic data. The TCGA RNA-Seq libraries were prepared by various different sequencing centers, but to facilitate harmonization across samples, the TCGA RNA-Seq v2 RSEM processing pipeline treated all RNA-Seq reads as unstranded. This resulted in a dataset of 10,822 transcriptomes spanning 40 different untreated primary tumor types and 26 adjacent normal tissue types (66 classes), with individual class sizes ranging from 3 to 1095 samples (**eTable 1**). No feature selection was done on the consolidated set of transcriptomes besides filtering for (a) genes with a recorded RPKM value in every sample ( $n=21,220$ ), and (b) genes that overlapped with available annotations for our independent test sets ( $n=17,688$ ). This resulted in a set of 10,822 samples, spanning 66 different tumor and adjacent normal classes, and with each sample represented by 17,688 distinct median normalized gene RPKM values. **eTable 1** shows the annotations used, following TCGA nomenclature. The table also shows the number of training samples available for each cancer type.

Training data was randomly split up into 4/5th model training data, and 1/5th held-out test data. The training and test splits maintained relative class frequencies. In classes with less than 5 samples (6 classes, all adjacent normal), 1 sample was randomly assigned to the held-out test set, and the remaining samples were kept in the model training set. All models discussed in this paper were trained on the 4/5th model training data, with the held-out test set used as the first external validation of performance of the fully trained models. Stratified 5-fold Cross Validation (5-CV) was used for hyperparameter selection for each algorithm. The StratifiedKFold function in the scikit-learn package in Python was used to generate class-balanced CV folds [2].

### **eAppendix 3. Test Data**

#### **Primary Mesotheliomas**

Mesothelioma is a rare and aggressive cancer arising in the linings of lung, abdomen, or the heart. The Genentech Mesothelioma dataset has 211 transcriptomes from untreated, primary lung biopsies of mesothelioma, spanning 4 distinct molecular subtypes of mesothelioma sarcomatoid (n=29), epithelioid (n=54), biphasic-epithelioid (n=72), and biphasic-sarcomatoid (n=56). The RNA-seq libraries were prepared using TruSeq RNA Sample Preparation kit (unstranded, polyA+) from Illumina, and sequenced on the HiSeq 2500 (66 million paired-end reads per sample) [3].

#### **Metastatic disease and CUPs**

The Personalized OncoGenomics (POG) project at the BC Cancer Agency (BCCA) was established in 2011 with the aim to sequence patients with cancers that no longer respond to standard treatment [4]. The project analyses the genomic and gene expression (transcriptomic) data of each patient, in order to identify drugs that can target the individual cancer. The vast majority of patients enrolled into POG presented with metastatic disease with a known primary diagnosis and location.

Biopsies are collected from the metastatic site in most cases. In a minority of cases, the tissue is taken from the original site of disease presentation (noted as such in main text, Table 2). This could be due to the intrinsic biology of the cancer in the form of LGG and GBM, or from multiple factors including site and size of lesion. Clinical laboratories at the BCCA assess the site of origin of POG cancer biopsies according to established protocols. The primary role of the pathologist in this context is to perform quality assurance of the tissue, in the determination of cellularity and percentage tumor content, to assist in downstream genomic interpretation.

Secondarily, she reviews the patient's clinical history for information pertaining to other archival pathology specimens particularly the initial untreated diagnostic tissue, often obtained from the primary site. Histological information of that tissue should match the subsequent specimen from the metastatic site. Typically, protein expression pattern, in the form of immunohistochemical (IHC) profile, should be similar but not necessarily identical. Lineage-specific markers that define the cell-of-origin of the tumor, such as specific cytokeratin markers, should be stable in its expression regardless of site. However, other biomarkers are more dynamic or labile, and their changes could represent alteration in the state of differentiation (for example, neuroendocrine dedifferentiation, malignant transformation) of the tumor or changes in the hormonal status and both could have significant impact on the biology of the

tumor and its management. A minimum pathology estimated tumor content of 40% in the tissue section is required prior to sequencing. Subsequently, standard Illumina protocols are followed for whole genome sequencing (WGS) for the tumor and peripheral blood (as control), and transcriptome sequencing for the tumor. The RNA-Seq libraries were prepared using strand specific RNA-Seq (ssRNA-Seq) Sample Preparation kit (stranded, polyA+) from Illumina, and sequenced on the Illumina HiSeq 2500 ( 200 million paired-end reads per sample). For the analysis presented in this paper, metastatic cases were selected from the POG cohort based on the following criteria (a) a primary of origin was identified, based on a joint consideration of clinical/pathology/genomic data, and (b) cDNA libraries prepared from the biopsy sample passed in-house quality control. Based on these criteria, we identified 201 samples spanning 26 different cancer types, summarized in (**eTable 2**). eTable 2 shows the annotations used, following TCGA nomenclature. The table also shows the number of training samples available for each cancer type.

Additionally, the POG cohort contained 16 cases where the primary site of origin could not be determined by initial pathology analysis. Genomic and transcriptomic analysis as part of the POG project determined the corresponding cancer type for 15 of these cases, which was used as gold standard for assessing the prediction from the classifier. The classification was performed retroactively after the closest suitable cancer type had been determined based on detailed pathway-level and genomic analyses of the cancer.

#### **eAppendix 4. Metrics Used**

Since the trained cancer and normal cohorts had variable representation in the training set (3 for adjacent normal subcutaneous melanoma, to 1095 for breast cancer), we used the F1-score as a measure of overall performance of the classifier. The F1-score is the harmonic mean of precision and recall, with 1.0 being the most desirable value (precision and recall of 1.0 for all output categories), and 0 representing a classifier that has 0 precision and 0 recall on all output categories.

For a given input, the ensemble generates a pooled confidence score for each of the 66 output classes. Predicted classes are jointly ordered by the confidence score and number of machines in agreement. This max vote-pooling method was used to obtain a quantitative confidence score for each category. This confidence score was taken as a proxy for differential diagnosis when assessing metastatic samples. Thus, in the event that the prediction from the ensemble classifier was split between different cancer types, the correctness of the prediction was assessed by comparing the diagnosed cancer type against the pool of confident predictions.

## **eAppendix 5. Data Pre-processing**

### **Data normalization**

Technical artifacts in the training data can be amplified if not filtered out, resulting in over-fitting while training a classifier. This results in a classifier that performs quite well on the training data, but does not generalize to samples that it has not seen during training. Data transformation is one way to avoid over fitting to the input data. This is generally done by re-scaling the input data to fall within a certain range of values, or by forcing it to follow a certain distribution (ex. normal distribution for expression data). We assessed the utility of data transformation in improving the best performing model, the shallow neural network trained with RPKM input. To this end, various scaling and data transformation methods, namely minmax scaling, L2 norm scaling, and rank normalization (average), were assessed separately. The performance of each approach was assessed by stratified 5-CV. Our assessment of normalization methods and feature selection (vs using the entire transcriptome) showed that (a) the actual RPKM profile across the 17,688 genes has a better classification performance than using feature selection or feature subsetting to known cancer-associated genes, and that (b) there is a performance gain with rank normalization of RPKM data prior to training.

### **Class expansion**

A supervised machine learning based classifier works by seeing multiple different samples representing each cancer/tissue type and steadily learning which genes (features) are most valuable in identifying each type of interest. A common problem with this approach is that a classifier can sometimes fail to appreciate the features that characterize the smaller cancer/tissue types. This class imbalance can be overcome by pre-processing the training set in specific ways by duplicating some of the samples in the smaller class(es), by punishing the classifier more for making a mistake with the smaller classes, or by supplementing the smaller classes with synthetic samples. One such method for adding synthetic samples to smaller classes is Synthetic Minority Oversampling (SMOTE). We trained and assessed the performance of the RPKM-based neural network classifier method using 3 different class expansion approaches, (a) duplicating samples randomly in the smaller cohorts to inflate their total sample size to the largest class, (b) adding an inverse weight factor for mis-classification of smaller classes (i.e. making it more expensive for the classifier to mislabel a sample from a smaller class during training), (c) adding synthetic samples using SMOTE, and compared these 3 approaches to (d) doing no class expansion. Duplicated/synthetic samples were only added to the training folds,



so that the cross-validation test fold always only contained non-synthetic samples that were absent in the training folds. The synthetic sampling algorithm is as adapted from Chawla et al [5]. The results over stratified 5-CV for each type of class expansion showed that there was an increase in overall F-score when SMOTE was used to expand the training folds.

**eAppendix 6. Feature Weight Analysis**

Following training of each neural network, the weights and biases for the fully connected layers were extracted using the `lasagne.layers.get_all_param_values(network)` function. Subsequently, following the rules of weight propagation in fully connected neural networks, a forward multiplication loop was evaluated, resulting in a matrix of dimensions [Number of genes, Number of output categories]. For each output category, the resultant network weights were sorted, and the top-100 genes with the highest weights for the class were saved. This was done over 5-cross validation models for each neural network, resulting in 25 lists of top-100 genes. For a given neural network, genes found to be top-ranked in at least 3 out of 5 CV folds were identified. Subsequently, for each category, the NN-specific top genes were filtered for occurrence in at least 3/5 neural networks, resulting in the presented list of important genes in each class (eTable 4).

## **eAppendix 7.** Differences in Performance on Held-out Set for Feature Selection Algorithms

As can be seen in main Figure 1(A), the performance of the different models is better on the held-out set than that quantified through cross-validation. This is because cross-validation only happens on 80% of the data, which in turn is split into 80% training and 20% cross-validation test fold. This impacts the smaller classes, which have fewer samples to train on in a cross-validation run. As a result, the performance of the classifier is poorer on the cross-validation test folds for such classes. However, when testing on the 20% heldout set, we are training the model on the entire 80% of the data. While this is of little consequence to classes that are well represented, the smaller classes are more thoroughly learnt during the training. This impact is evident in eFigure 6.

**eTable 1.** Cancer Types and Corresponding Abbreviations Used for Training, and Referenced in Text.*The training cohort sizes are indicated for the adjacent normal and primary tumor.*

| Abbreviation  | Full Name                                             | Case count – Normal | Case count - Tumor |
|---------------|-------------------------------------------------------|---------------------|--------------------|
| ACC           | Adrenocortical Carcinoma                              | -                   | 79                 |
| BLCA          | Urothelial Bladder Carcinoma                          | 19                  | 408                |
| BRCA          | Breast Ductal Carcinoma                               | 113                 | 1095               |
| CESC_CAD      | Cervical and Endocervical Adenocarcinoma              | 3                   | 47                 |
| CESC_SCC      | Cervical Squamous Cell Carcinoma                      | 6                   | 257                |
| CHOL          | Cholangiocarcinoma                                    | 27                  | 36                 |
| COADREAD      | Colorectal Adenocarcinoma                             | 51                  | 372                |
| DLBC          | Diffuse Large B-Cell Lymphoma                         | -                   | 48                 |
| DLBC_BM       | DLBCL Blood/Bone Marrow                               | -                   | 11                 |
| ESCA          | Esophageal Carcinoma                                  | 3                   | 15                 |
| ESCA_EAC      | Esophageal Adenocarcinoma                             | 24                  | 79                 |
| ESCA_SCC      | Esophageal Squamous Cell Carcinoma                    | 6                   | 90                 |
| FL            | Follicular Lymphoma                                   | -                   | 50                 |
| GBM           | Glioblastoma Multiforme                               | 15                  | 161                |
| HNSC          | Head and Neck Squamous Cell Carcinoma                 | 44                  | 520                |
| KICH          | Chromophobe Renal Cell Carcinoma / Kidney Chromophobe | 25                  | 66                 |
| KIRC          | Renal Clear Cell Carcinoma                            | 72                  | 533                |
| KIRP          | Papillary Renal Cell Carcinoma                        | 32                  | 290                |
| LAML          | Acute Myeloid Leukemia                                | -                   | 173                |
| LGG           | Lower Grade Glioma                                    | -                   | 516                |
| LIHC          | Liver Hepatocellular Carcinoma                        | 50                  | 371                |
| LUAD          | Lung Adenocarcinoma                                   | 59                  | 515                |
| LUSC          | Lung Squamous Cell Carcinoma                          | 50                  | 501                |
| MB-Adult      | Adult Medulloblastoma                                 | -                   | 143                |
| MESO          | Mesothelioma                                          | -                   | 87                 |
| NCI_GPH_DLBCL | Diffuse Large B-Cell Lymphoma (NCI cohort)            | -                   | 111                |
| OV            | Ovarian Serous Cystadenocarcinoma                     | -                   | 305                |
| PAAD          | Pancreatic Ductal Adenocarcinoma                      | 12                  | 178                |
| PCPG          | Paranglioma & Pheochromocytoma                        | 9                   | 179                |
| PRAD          | Prostate Adenocarcinoma                               | 52                  | 497                |
| SARC          | Sarcoma                                               | 6                   | 259                |
| SKCM          | Cutaneous Melanoma                                    | 3                   | 469                |
| STAD          | Stomach Adenocarcinoma                                | 35                  | 415                |
| TFRI_GBM_NCL  | Glioblastoma Multiforme (TFRI cohort)                 | -                   | 52                 |
| TGCT          | Testicular Germ Cell Cancer                           | -                   | 150                |
| THCA          | Thyroid Carcinoma                                     | 59                  | 505                |
| THYM          | Thymoma                                               | 6                   | 120                |
| UCEC          | Uterine Corpus Endometrial Carcinoma                  | 24                  | 177                |
| UCS           | Uterine Carcinoma                                     | -                   | 57                 |
| UVM           | Uveal Melanoma                                        | -                   | 80                 |
|               |                                                       | <b>805</b>          | <b>10,017</b>      |

**eTable 2.** Breakdown of Cancer Types in the External Metastatic Cohort

| Abbreviation | Organ System           | Full Name                                | Case count |
|--------------|------------------------|------------------------------------------|------------|
| ACC          | Endocrine              | Adrenocortical Carcinoma                 | 2          |
| BRCA         | Breast                 | Breast Ductal Carcinoma                  | 69         |
| CESC_CAD     | Gynecologic            | Cervical and Endocervical Adenocarcinoma | 1          |
| CHOL         | Gastrointestinal       | Cholangiocarcinoma                       | 5          |
| COADREAD     | Gastrointestinal       | Colorectal Adenocarcinoma                | 22         |
| DLBC         | Hematologic            | Diffuse Large B-Cell Lymphoma            | 1          |
| ESCA_EAC     | Gastrointestinal       | Esophageal Adenocarcinoma                | 2          |
| ESCA_SCC     | Gastrointestinal       | Esophageal Squamous Cell Carcinoma       | 4          |
| FL           | Hematologic            | Follicular Lymphoma                      | 1          |
| GBM          | Central Nervous System | Glioblastoma Multiforme                  | 4          |
| KIRP         | Urologic               | Papillary Renal Cell Carcinoma           | 2          |
| LIHC         | Gastrointestinal       | Liver Hepatocellular Carcinoma           | 1          |
| LGG          | Central Nervous System | Lower Grade Glioma                       | 2          |
| LUAD         | Thoracic               | Lung Adenocarcinoma                      | 18         |
| LUSC         | Thoracic               | Lung Squamous Cell Carcinoma             | 1          |
| MESO         | Thoracic               | Mesothelioma                             | 5          |
| OV           | Gynecologic            | Ovarian Serous Cystadenocarcinoma        | 7          |
| PAAD         | Gastrointestinal       | Pancreatic Ductal Adenocarcinoma         | 11         |
| PRAD         | Urologic               | Prostate Adenocarcinoma                  | 1          |
| SARC         | Soft Tissue            | Sarcoma                                  | 23         |
| SKCM         | Skin                   | Cutaneous Melanoma                       | 3          |
| STAD         | Gastrointestinal       | Stomach Adenocarcinoma                   | 3          |
| TGCT         | Urologic               | Testicular Germ Cell Cancer              | 1          |
| THYM         | Hematologic            | Thymoma                                  | 1          |
| UCEC         | Gynecologic            | Uterine Corpus Endometrial Carcinoma     | 6          |
| UCS          | Gynecologic            | Uterine Carcinoma                        | 5          |
|              |                        |                                          | <b>201</b> |

**eTable 3.** Architecture and Identifying Names for Each Neural Network That Makes up the SCOPE Ensemble Classifier.

| <b>Model Name</b> | <b>Architecture</b>        | <b>Data pre-processing</b>      | <b>Additional Rules</b>         |
|-------------------|----------------------------|---------------------------------|---------------------------------|
| None17k           | 17688 x 17000 x 66         | None (RPKM)                     | None                            |
| None17kDropout    | 17688 x 17000 x 17000 x 66 | None (RPKM)                     | Dropout (10%) input in training |
| SmoteNone17k      | 17688 x 17000 x 66         | None (RPKM) + SMOTE samples     | None                            |
| Rm500             | 17688 x 500 x 66           | Rank norm + Minmax(0,1) scaling | None                            |
| Rm500Dropout      | 17688 x 500 x 500 x 66     | Rank norm + Minmax(0,1) scaling | Dropout (10%) input in training |

**eTable 4.** Important Genes Based on Frequency Analysis of Gene Weights for Each Neural Network in SCOPE

| Abbreviation | Malignancy      | Organ System           | Important Genes                                                                                                                    |
|--------------|-----------------|------------------------|------------------------------------------------------------------------------------------------------------------------------------|
| ACC          | Tumor           | Endocrine              | CYP11A1, CYP17A1, CYP21A2, DLK1, GSTA1, IGF2, NPTX2, STAR                                                                          |
| BLCA         | Adjacent Normal | Urologic               | ACTG2, CNN1, DES, DHRS2, GPX2, KRT13, KRT5, LY6D, OLFM4, PLA2G2A, S100P, SPRR3, UPK2                                               |
| BLCA         | Tumor           | Urologic               | AKR1C2, DES, DHRS2, GATA3, GPX2, KRT13, KRT17, KRT5, PSCA, S100P, SPINK1, UPK1B, UPK2                                              |
| BRCA         | Adjacent Normal | Breast                 | ADH1B, ADIPOQ, APOD, AZGP1, GATA3, KRT14, LPL, MUCL1, PIP, PLIN1, S100A1, SAA1, SCGB1D2, SCGB2A2, TFF1                             |
| BRCA         | Tumor           | Breast                 | AGR3, AZGP1, CALML5, CRABP2, EFHD1, FABP4, GATA3, KRT14, KRT6B, LTF, MMP11, MUCL1, NPY1R, PIP, SCGB2A2, SERPINA3, SPDEF, TFF1      |
| CESC_CAD     | Adjacent Normal | Gynecologic            | DES                                                                                                                                |
| CESC_CAD     | Tumor           | Gynecologic            | CEACAM5, CLDN3, KRT7, MMP11, PIGR, SCGB2A1                                                                                         |
| CESC_SCC     | Adjacent Normal | Gynecologic            | CNN1                                                                                                                               |
| CESC_SCC     | Tumor           | Gynecologic            | CALML3, KRT13, KRT14, KRT19, KRT5, KRT6A, MMP11                                                                                    |
| CHOL         | Tumor           | Gastrointestinal       | AGT, ALB, AMBP, CEACAM6, CRP, FGA, FGB, FGG, ORM1, REG1A, TM4SF4, TTR                                                              |
| COADREAD     |                 | Gastrointestinal       | AQP8, CA1, CEACAM7, CLCA1, DES, FABP1, FAM3D, GPX2, GUCA2A, KRT20, SLC26A3, SPINK4, ZG16                                           |
| COADREAD     |                 | Gastrointestinal       | CDH17, CDX2, CEACAM5, CEACAM6, DPEP1, FABP1, FAM3D, GPX2, LGALS4, MUC13, MUC2, PLA2G2A, PPP1R1B, REG4, S100P, SPINK4, TSPAN8, VIL1 |
| DLBC         | Tumor           | Hematologic            | -                                                                                                                                  |
| DLBC_BM      | Tumor           | Hematologic            | -                                                                                                                                  |
| ESCA         | Adjacent Normal | Gastrointestinal       | KRT13                                                                                                                              |
| ESCA         | Tumor           | Gastrointestinal       | CLDN18, CST1, MALAT1, REG1A, REG3A, SPINK1                                                                                         |
| ESCA_EAC     | Adjacent Normal | Gastrointestinal       | ACTG2, DES, LIPF, PGA3, PGA4                                                                                                       |
| ESCA_EAC     | Tumor           | Gastrointestinal       | CEACAM5, CST1, KRT13, LGALS4, MALAT1, MUC13, PIGR, PLA2G2A, S100A7, SPRR3, TSPAN8, UBD                                             |
| ESCA_SCC     | Adjacent Normal | Gastrointestinal       | SPRR1B                                                                                                                             |
| ESCA_SCC     | Tumor           | Gastrointestinal       | CALML3, CST1, DES, KRT14, KRT5, LY6D, MALAT1, S100A7, SPRR1B, SPRR3, TRIM29                                                        |
| FL           | Tumor           | Hematologic            | CCL21                                                                                                                              |
| GBM          | Tumor           | Central Nervous System | AQP4, CHI3L1, GFAP                                                                                                                 |
| HNSC         | Adjacent Normal | Head and Neck          | ACTA1, CALML5, CKM, KRT13, KRT4, MB, MUC7, MYH2, MYL1, MYL2, MYLPF, PIP, PRB3, SAA1, SCGB3A1, SMR3B, STATH, TCAP, TGM3, TNNC2      |

|                |                 |                        |                                                                                                                                   |
|----------------|-----------------|------------------------|-----------------------------------------------------------------------------------------------------------------------------------|
| HNSC           | Tumor           | Head and Neck          | ACTA1, CALML3, CALML5, KRT13, KRT14, LGALS7, MMP1, SPRR2A, SPRR3                                                                  |
| KICH           | Adjacent Normal | Urologic               | ALDOB, AQP2, FXYD2, UMOD                                                                                                          |
| KICH           | Tumor           | Urologic               | ATP6V0A4, ATP6V0D2, CDH16, DEFB1, RHCG, SPINK1, SPP1, TMEM213                                                                     |
| KIRC           | Adjacent Normal | Urologic               | AQP2, CDH16, SLC34A2, UMOD                                                                                                        |
| KIRC           | Tumor           | Urologic               | ANGPTL4, CA12, CA9, DEFB1, EGLN3, ESM1, FXYD2, GSTA1, NAT8                                                                        |
| KIRP           | Adjacent Normal | Urologic               | AQP2, PIGR, UMOD                                                                                                                  |
| KIRP           | Tumor           | Urologic               | C19orf33, MAL, MMP7, PIGR, SST, WFDC2                                                                                             |
| LAML           | Tumor           | Hematologic            | AZU1, CSF3R, FOSB, MPO, PRTN3, RNASE2, S100A8                                                                                     |
| LGG            | Tumor           | Central Nervous System | EEF1A1P9, GFAP, PTPRZ1                                                                                                            |
| LIHC           | Adjacent Normal | Gastrointestinal       | IGFBP1                                                                                                                            |
| LIHC           | Tumor           | Gastrointestinal       | ALB, APCS, APOA2, APOC3, CRP, FGA, FGB, GC, HULC, ITIH2, RBP4, TF, TM4SF4, UBD, VTN                                               |
| LUAD           | Adjacent Normal | Thoracic               | HBA1, NAPSA, SCGB1A1, SCGB3A1, SCGB3A2, SFTPA1, SFTPB, SFTPC, SFTPD, SLPI                                                         |
| LUAD           | Tumor           | Thoracic               | C8orf4, CEACAM5, CRABP2, FGG, NAPSA, PGC, S100P, SCGB1A1, SCGB3A1, SCGB3A2, SFTA2, SFTPA1, SFTPA2, SFTPB, SLC34A2, SPINK1         |
| LUSC           | Adjacent Normal | Thoracic               | CCL21, NAPSA, RPS4Y1, SCGB1A1, SCGB3A1, SCGB3A2, SFTA2, SFTPA1, SFTPA2, SFTPB, SFTPC, SFTPD, SLC34A2                              |
| LUSC           | Tumor           | Thoracic               | AKR1C2, CALML3, CES1, KRT15, KRT16, KRT19, KRT5, KRT6A, KRT6B, NAPSA, NTS, SCGB1A1, SCGB3A2, SFTPA1, SFTPA2, SFTPB, SFTPC, SPRR2A |
| MB-Adult       | Tumor           | Central Nervous System | GFAP, STMN2                                                                                                                       |
| MESO           | Tumor           | Thoracic               | C19orf33, CALB2, EFEMP1, ITLN1, KRT19, KRT7, MSLN, UPK3B                                                                          |
| NCI_GPH_D LBCL | Tumor           | Hematologic            | -                                                                                                                                 |
| OV             | Tumor           | Gynecologic            | CHI3L1, CLDN3, FOLR1, KLK6, KLK7, MALAT1, MSLN, PAX8, SCGB2A1, SOX17, SST                                                         |
| PAAD           | Adjacent Normal | Gastrointestinal       | CELA3A, CPA1, CPB1, CRP, CTRB1, CTRB2, CTCR, CTSE, GCG, INS, PNLIP, PPY, PRSS1, REG1A, REG3A, TTR                                 |
| PAAD           | Tumor           | Gastrointestinal       | AGR2, CEACAM5, CHGB, CTRB1, CTRB2, GCG, INS, PNLIP, PPY, REG1A, REG4, S100P, SFRP2, SPINK1, SST, TFF1, TFF2, TTR                  |
| PCPG           | Adjacent Normal | Endocrine              | CYP11B1, CYP17A1, DLK1, GSTA1, STAR                                                                                               |
| PCPG           | Tumor           | Endocrine              | CHGA, CHGB, DBH, DLK1, NPY, PENK                                                                                                  |
| PRAD           | Adjacent Normal | Urologic               | ACPP, KLK2, KLK3, KLK4, NPY, OLFM4, PIP, SEMG1                                                                                    |



|              |                 |                        |                                                                                       |
|--------------|-----------------|------------------------|---------------------------------------------------------------------------------------|
| PRAD         | Tumor           | Urologic               | ACTG2, AZGP1, DES, FOLH1, FOXA1, KLK2, KLK3, KLK4, NKX3-1, NPY, PLA2G2A, SLC45A3      |
| SARC         | Tumor           | Soft Tissue            | DLK1                                                                                  |
| SKCM         | Adjacent Normal | Skin                   | DCT, MLANA, PRAME, TYR                                                                |
| SKCM         | Tumor           | Skin                   | APOD, DCT, EDNRB, KRT6B, MLANA, PLP1, PRAME, S100A1, SERPINE2, SOX10, TYR, TYRP1, VGF |
| STAD         | Adjacent Normal | Gastrointestinal       | ACTG2, APOA1, APOA4, CLDN18, DES, GKN1, HSPB6, PGA4, PGC, PI3, REG3A                  |
| STAD         | Tumor           | Gastrointestinal       | ACTG2, CEACAM6, CST1, MALAT1, PGC, REG4, SPINK1, TFF1, TFF3                           |
| TFRI_GBM_NCL | Tumor           | Central Nervous System | MALAT1, PCDHGA1, PCDHGA8, PCDHGC4, PMP2                                               |
| TGCT         | Tumor           | Urologic               | DPPA3, DPPA5, GDF3, NANOG, POU5F1                                                     |
| THCA         | Adjacent Normal | Endocrine              | CCL21, HBA2, MT1G, PAX8, TG, TPO                                                      |
| THCA         | Tumor           | Endocrine              | C16orf89, CLIC3, NKX2-1, S100A1, SFTA3, SFTPB, TG, TPO, ZCCHC12                       |
| THYM         | Adjacent Normal | Hematologic            | CALML3, CCL25, KRT5                                                                   |
| THYM         | Tumor           | Hematologic            | CALML3, CCL25, DNMT1, KRT14, KRT15, KRT17, KRT19, KRT5, PAX1                          |
| UCEC         | Adjacent Normal | Gynecologic            | CNN1, DES                                                                             |
| UCEC         | Tumor           | Gynecologic            | MMP11, MSX1, PAX8, SCGB1D2, SCGB2A1, SFN, VTCN1                                       |
| UCS          | Tumor           | Gynecologic            | CRABP1, DLK1, PCOLCE, PRAME                                                           |
| UVM          | Tumor           | Head and Neck          | CITED1, MLANA, SOX10, TYR, TYRP1                                                      |

**eTable 5.** Detailed Breakdown of Prediction Trends in the Metastatic Cohort, With Classes of Mispredictions Listed.

Number of cases mispredicted as a specific classes are listed alongside in brackets.

<sup>a</sup>Precision, as indicated, is equivalent to class-specific accuracy.

<sup>b</sup>Prediction categories: Cases where predicted cancer type matched pathology diagnosis (Diagnosis) / was same as tissue type of biopsy site (Biopsy Site) / matched a cancer type with same organ-system of origin (Organ-system) / did not match any of the above (Other).

AC = “Adenocarcinoma”, CA = “Carcinoma”, SCC = “Squamous Cell Carcinoma”, CESC – AC = “Cervical/Endocervical Adenocarcinoma”, UCEC= “Uterine Corpus Endometrial Carcinoma”

GEJ\_group: Esophageal AC, Esophageal SCC, Stomach AC, Liver Hepatocarcinoma, Papillary Kidney CA

| Diagnosed Type                  | Total Cases | Cohort metrics <sup>a</sup> |        |          | Count of cases predicted as <sup>b</sup> |             |                |                                     |
|---------------------------------|-------------|-----------------------------|--------|----------|------------------------------------------|-------------|----------------|-------------------------------------|
|                                 |             | Precision                   | Recall | F1-Score | Diagnosis                                | Biopsy Site | Organ-system   | Other                               |
| <b>Metastatic Site Biopsies</b> |             |                             |        |          |                                          |             |                |                                     |
| Adenocortical CA                | 1           | 1.00                        | 1.00   | 1.00     | 1                                        | -           | -              | -                                   |
| Follicular Lymphoma             | 1           | 1.00                        | 1.00   | 1.00     | 1                                        | -           | -              | -                                   |
| Mesothelioma                    | 1           | 1.00                        | 1.00   | 1.00     | 1                                        | -           | -              | -                                   |
| Prostate AC                     | 1           | 1.00                        | 1.00   | 1.00     | 1                                        | -           | -              | -                                   |
| Testicular Germ Cell Tumor      | 1           | 1.00                        | 1.00   | 1.00     | 1                                        | -           | -              | -                                   |
| Thymoma                         | 1           | 1.00                        | 1.00   | 1.00     | 1                                        | -           | -              | -                                   |
| Colorectal AC                   | 21          | 1.00                        | 0.81   | 0.89     | 17                                       | LIHC        | STAD(2)        | CHOL_n                              |
| Papillary Kidney AC             | 2           | 1.00                        | 0.50   | 0.67     | 1                                        | -           | -              | LUAD                                |
| UCEC                            | 5           | 1.00                        | 0.40   | 0.57     | 2                                        | -           | BRCA           | BLCA,STAD                           |
| Uterine Carcinosarcoma          | 4           | 1.00                        | 0.25   | 0.40     | 1                                        | -           | OV, SARC       | HNSC                                |
| Breast CA                       | 65          | 0.97                        | 0.97   | 0.97     | 63                                       | LIHC_n      | -              | BLCA                                |
| Lung AC                         | 14          | 0.93                        | 1.00   | 0.97     | 14                                       | -           | -              | -                                   |
| Sarcoma                         | 17          | 0.90                        | 0.53   | 0.67     | 9                                        | LIHC        | -              | BRCA, DLBC (2), GBM, SKCM (2), KIRC |
| Ovarian CA                      | 7           | 0.86                        | 0.86   | 0.86     | 6                                        | -           | -              | PAAD                                |
| Prostate AC                     | 9           | 0.75                        | 0.33   | 0.46     | 3                                        | LIHC        | CHOL (3), LUSC | BLCA                                |
| Cholangio-CA                    | 5           | 0.67                        | 0.80   | 0.73     | 4                                        | -           | STAD           | -                                   |
| Cutaneous Melanoma              | 2           | 0.50                        | 1.00   | 0.67     | 2                                        | -           | -              | -                                   |
| Diffuse Large B-Cell Lymphoma   | 1           | 0.33                        | 1.00   | 0.50     | 1                                        | -           | -              | -                                   |
| Stomach AC                      | 3           | 0.25                        | 0.67   | 0.36     | 2                                        | LIHC        | -              | -                                   |
| CESC-AC                         | 1           | 0.00                        | 0.00   | 0.00     | -                                        | -           | -              | STAD                                |
| Esophageal AC                   | 2           | 0.00                        | 0.00   | 0.00     | -                                        | LIHC        | STAD           | -                                   |
| Esophageal SCC                  | 4           | 0.00                        | 0.00   | 0.00     | -                                        | LUSC(1)     | -              | CESC_SCC (2), LUSC (1)              |
| <b>Primary Site Biopsies</b>    |             |                             |        |          |                                          |             |                |                                     |
| Adrenocortical CA               | 1           | 1.00                        | 1.00   | 1.00     | 1                                        | -           | -              | -                                   |

|                            |            |             |             |             |            |          |           |           |
|----------------------------|------------|-------------|-------------|-------------|------------|----------|-----------|-----------|
| Breast CA                  | 4          | 1.00        | 1.00        | 1.00        | 4          | -        | -         | -         |
| Colorectal AC              | 1          | 1.00        | 1.00        | 1.00        | 1          | -        | -         | -         |
| Glioblastoma<br>Multiforme | 4          | 1.00        | 1.00        | 1.00        | 4          | -        | -         | -         |
| Brain Glioma               | 2          | 1.00        | 1.00        | 1.00        | 2          | -        | -         | -         |
| Liver<br>Hepatocarcinoma   | 1          | 1.00        | 1.00        | 1.00        | 1          | -        | -         | -         |
| Pancreatic AC              | 2          | 1.00        | 1.00        | 1.00        | 2          | -        | -         | -         |
| Cutaneous<br>Melanoma      | 1          | 1.00        | 1.00        | 1.00        | 1          | -        | -         | -         |
| Uterine<br>Carcinosarcoma  | 1          | 1.00        | 1.00        | 1.00        | 1          | -        | -         | -         |
| Sarcoma                    | 6          | 1.00        | 0.83        | 0.91        | 5          | -        | -         | HNSC      |
| Lung AC                    | 4          | 1.00        | 0.75        | 0.86        | 3          | -        | LUSC      | -         |
| Mesothelioma               | 4          | 1.00        | 0.75        | 0.86        | 3          | -        | -         | KIRC      |
| Lung SCC                   | 1          | 0.50        | 1.00        | 0.67        | 1          | -        | -         | -         |
| UCEC                       | 1          | 0.00        | 0.00        | 0.00        | -          | -        | CESC_SCC  | -         |
|                            | <b>201</b> | <b>0.80</b> | <b>0.76</b> | <b>0.75</b> | <b>160</b> | <b>7</b> | <b>13</b> | <b>21</b> |

**eTable 6.** Detailed Version of Table 2, Whereby the Performance of the Smaller Classes Has Been Described in Detail.

<sup>a</sup>TP = “True Positive Count”, TN = “True Negative Count”, FP = “False Positive Count”, FN = “False Negative Count”

Precision, as indicated, is equivalent to class-specific accuracy.

<sup>b</sup>Prediction categories: Cases where predicted cancer type matched pathology diagnosis (Diagnosis) / was same as tissue type of biopsy site (Biopsy Site) / matched a cancer type with same organ-system of origin (Organ-system) / did not match any of the above (Other)

AC = “Adenocarcinoma”, CA = “Carcinoma”, SCC = “Squamous Cell Carcinoma”, CESC – AC = “Cervical/Endocervical Adenocarcinoma”, UCEC= “Uterine Corpus Endometrial Carcinoma”  
 GEJ\_group: Esophageal AC, Esophageal SCC, Stomach AC, Liver Hepatocarcinoma, Papillary Kidney CA

| Diagnosed Type                  | Total Cases | Cohort metrics <sup>a</sup> |     |    |    |           |        |          | Count of cases predicted as <sup>b</sup> |             |              |       |
|---------------------------------|-------------|-----------------------------|-----|----|----|-----------|--------|----------|------------------------------------------|-------------|--------------|-------|
|                                 |             | TP                          | TN  | FP | FN | Precision | Recall | F1-Score | Diagnosis                                | Biopsy Site | Organ-system | Other |
| <b>Metastatic Site Biopsies</b> |             |                             |     |    |    |           |        |          |                                          |             |              |       |
| Adenocortical CA                | 1           | 1                           | 130 | 0  | 0  | 1.00      | 1.00   | 1.00     | 1                                        | -           | -            | -     |
| Follicular Lymphoma             | 1           | 1                           | 130 | 0  | 0  | 1.00      | 1.00   | 1.00     | 1                                        | -           | -            | -     |
| Mesothelioma                    | 1           | 1                           | 130 | 0  | 0  | 1.00      | 1.00   | 1.00     | 1                                        | -           | -            | -     |
| Prostate AC                     | 1           | 1                           | 130 | 0  | 0  | 1.00      | 1.00   | 1.00     | 1                                        | -           | -            | -     |
| Testicular Germ Cell Tumor      | 1           | 1                           | 130 | 0  | 0  | 1.00      | 1.00   | 1.00     | 1                                        | -           | -            | -     |
| Thymoma                         | 1           | 1                           | 130 | 0  | 0  | 1.00      | 1.00   | 1.00     | 1                                        | -           | -            | -     |
| Colorectal AC                   | 21          | 17                          | 114 | 0  | 4  | 1.00      | 0.81   | 0.89     | 17                                       | 1           | 2            | 1     |
| Papillary Kidney AC             | 2           | 1                           | 130 | 0  | 1  | 1.00      | 0.50   | 0.67     | 1                                        | -           | -            | 1     |
| UCEC                            | 5           | 2                           | 129 | 0  | 3  | 1.00      | 0.40   | 0.57     | 2                                        | -           | 1            | 2     |
| Uterine Carcinosarcoma          | 4           | 1                           | 130 | 0  | 3  | 1.00      | 0.25   | 0.40     | 1                                        | -           | 2            | 1     |
| Breast CA                       | 65          | 63                          | 68  | 2  | 2  | 0.97      | 0.97   | 0.97     | 63                                       | 1           | -            | 1     |
| Lung AC                         | 14          | 14                          | 117 | 1  | 0  | 0.93      | 1.00   | 0.97     | 14                                       | -           | -            | -     |
| Sarcoma                         | 17          | 9                           | 122 | 1  | 8  | 0.90      | 0.53   | 0.67     | 9                                        | 1           | -            | 7     |
| Ovarian CA                      | 7           | 6                           | 125 | 1  | 1  | 0.86      | 0.86   | 0.86     | 6                                        | -           | -            | 1     |
| Pancreatic AC                   | 9           | 3                           | 128 | 1  | 6  | 0.75      | 0.33   | 0.46     | 3                                        | 1           | 4            | 1     |
| Cholangio-CA                    | 5           | 4                           | 127 | 2  | 1  | 0.67      | 0.80   | 0.73     | 4                                        | -           | 1            | -     |
| Cutaneous Melanoma              | 2           | 2                           | 129 | 2  | 0  | 0.50      | 1.00   | 0.67     | 2                                        | -           | -            | -     |
| Diffuse Large B-Cell Ly.        | 1           | 1                           | 130 | 2  | 0  | 0.33      | 1.00   | 0.50     | 1                                        | -           | -            | -     |
| Stomach AC                      | 3           | 2                           | 129 | 6  | 1  | 0.25      | 0.67   | 0.36     | 2                                        | 1           | -            | -     |
| CESC-AC                         | 1           | 0                           | 131 | 0  | 1  | 0.00      | 0.00   | 0.00     | -                                        | -           | -            | 1     |
| Esophageal AC                   | 2           | 0                           | 131 | 0  | 2  | 0.00      | 0.00   | 0.00     | -                                        | 1           | 1            | -     |
| Esophageal SCC                  | 4           | 0                           | 131 | 0  | 4  | 0.00      | 0.00   | 0.00     | -                                        | 1           | 0            | 3     |
| <b>Primary Site Biopsies</b>    |             |                             |     |    |    |           |        |          |                                          |             |              |       |
| Adrenocortical CA               | 1           | 1                           | 28  | 0  | 0  | 1.00      | 1.00   | 1.00     | 1                                        | -           | -            | -     |
| Breast CA                       | 4           | 4                           | 25  | 0  | 0  | 1.00      | 1.00   | 1.00     | 4                                        | -           | -            | -     |
| Colorectal AC                   | 1           | 1                           | 28  | 0  | 0  | 1.00      | 1.00   | 1.00     | 1                                        | -           | -            | -     |
| Glioblastoma Multiforme         | 4           | 4                           | 25  | 0  | 0  | 1.00      | 1.00   | 1.00     | 4                                        | -           | -            | -     |

|                        |            |            |             |           |           |             |             |             |            |          |           |           |
|------------------------|------------|------------|-------------|-----------|-----------|-------------|-------------|-------------|------------|----------|-----------|-----------|
| Brain Glioma           | 2          | 2          | 27          | 0         | 0         | 1.00        | 1.00        | 1.00        | 2          | -        | -         | -         |
| Liver Hepatocarcinoma  | 1          | 1          | 28          | 0         | 0         | 1.00        | 1.00        | 1.00        | 1          | -        | -         | -         |
| Pancreatic AC          | 2          | 2          | 27          | 0         | 0         | 1.00        | 1.00        | 1.00        | 2          | -        | -         | -         |
| Cutaneous Melanoma     | 1          | 1          | 28          | 0         | 0         | 1.00        | 1.00        | 1.00        | 1          | -        | -         | -         |
| Uterine Carcinosarcoma | 1          | 1          | 28          | 0         | 0         | 1.00        | 1.00        | 1.00        | 1          | -        | -         | -         |
| Sarcoma                | 6          | 5          | 24          | 0         | 1         | 1.00        | 0.83        | 0.91        | 5          | -        | -         | 1         |
| Lung AC                | 4          | 3          | 26          | 0         | 1         | 1.00        | 0.75        | 0.86        | 3          | -        | 1         | -         |
| Mesothelioma           | 4          | 3          | 26          | 0         | 1         | 1.00        | 0.75        | 0.86        | 3          | -        | -         | 1         |
| Lung SCC               | 1          | 1          | 28          | 1         | 0         | 0.50        | 1.00        | 0.67        | 1          | -        | -         | -         |
| UCEC                   | 1          | 0          | 29          | 0         | 1         | 0.00        | 0.00        | 0.00        | -          | -        | 1         | -         |
|                        | <b>201</b> | <b>160</b> | <b>3128</b> | <b>19</b> | <b>41</b> | <b>0.80</b> | <b>0.76</b> | <b>0.75</b> | <b>160</b> | <b>7</b> | <b>13</b> | <b>21</b> |

**eFigure 1.** Performance of Various Models (Distinct Based on Feature Selection and Architecture) on the Held-out Set.

The x-axis has been ordered by increasing class size, indicated in the first panel, and performance is shown on the CV-folds (black) and on the held-out set (yellow). As can be seen, the difference between CV-fold performance and held-out performance is large for small classes, but peters off as the class size approaches >100. When the classifier is augmented by addition of synthetic samples in the training folds (last panel), we see that there is an overall increase in performance for the rare classes, and the gap between mean-CV-precision and heldout precision is minimized. The line of best fit (loess) is indicated for each model, with standard error bounds in grey. The performance in different CV folds is shown by the black point (mean) with 1 standard deviation bars.

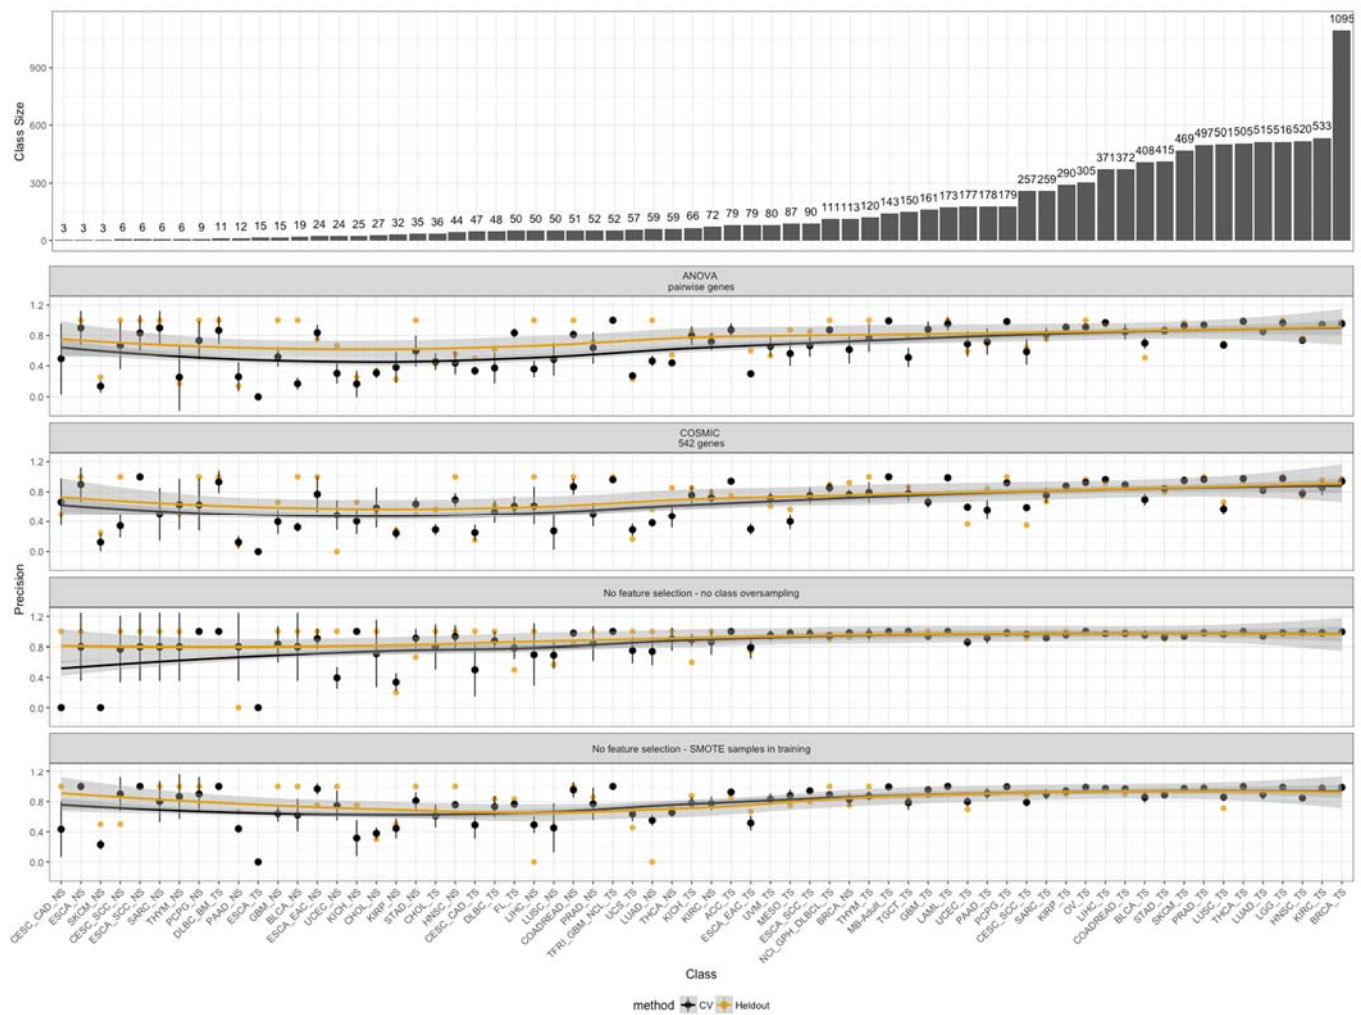

**eFigure 2.** Performance of Algorithms on CV Folds During Training.

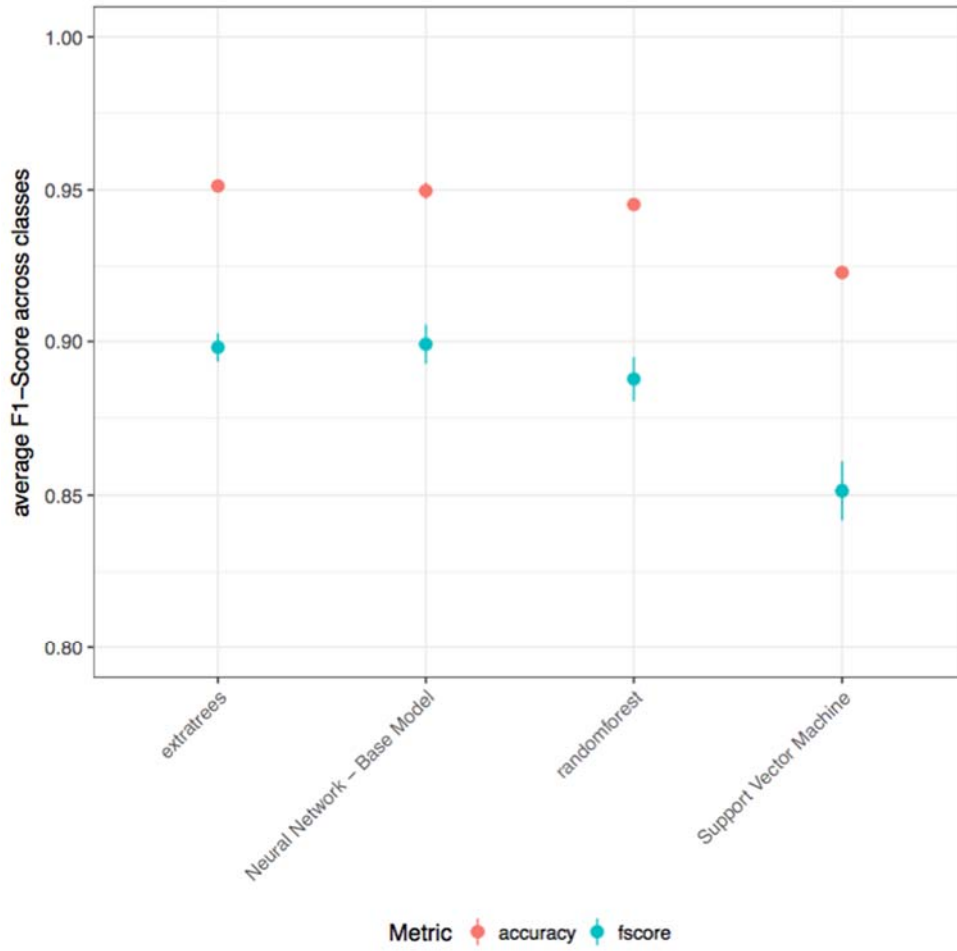

**eFigure 3.** Performance of SCOPE on the Held-out Set.

All 66 classes are shown, (a) showing performance between tumors and normal counterpart classes, and (b) showing cross-calling patterns originating from the normal class samples in the held-out set.

Performance of individual neural networks that make up SCOPE (n=5) are shown in grey points.

a) The average and 1 standard deviation spread of class-specific F1-score across these is shown in black (black point = mean, error bars = standard deviation). The two panels separate the normal (n=26) and tumor (n=40) tissue classes.

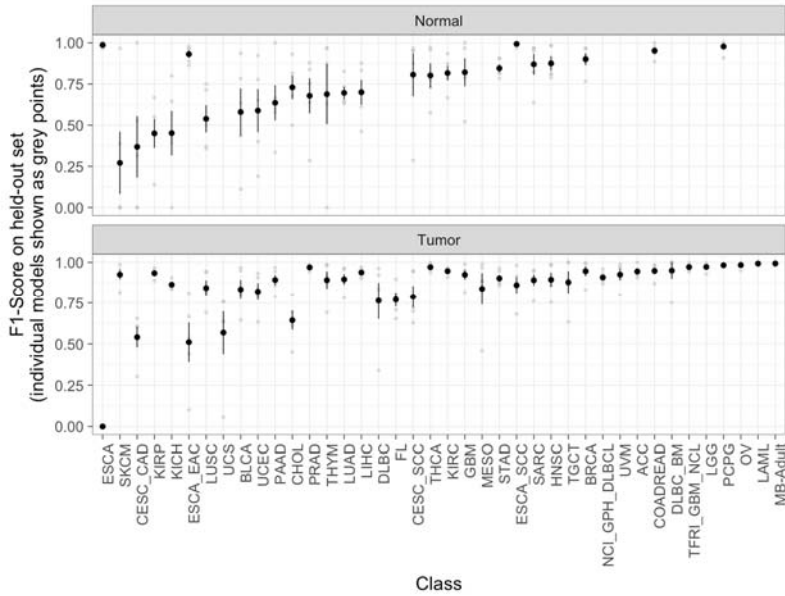

b) The average and 1 standard deviation spread of class-specific F1-scores across the ensemble machines is shown by the colored error bars. “\_TS” and “\_NS” indicate tumor and normal tissue classes respectively. Width of curves indicates proportion of cross-called samples from the originating class (direction indicated by arrow), with the smallest width corresponding to 15% of samples. As is evident, cross-calling is mostly between normal tissues from the same organ-system of origin.

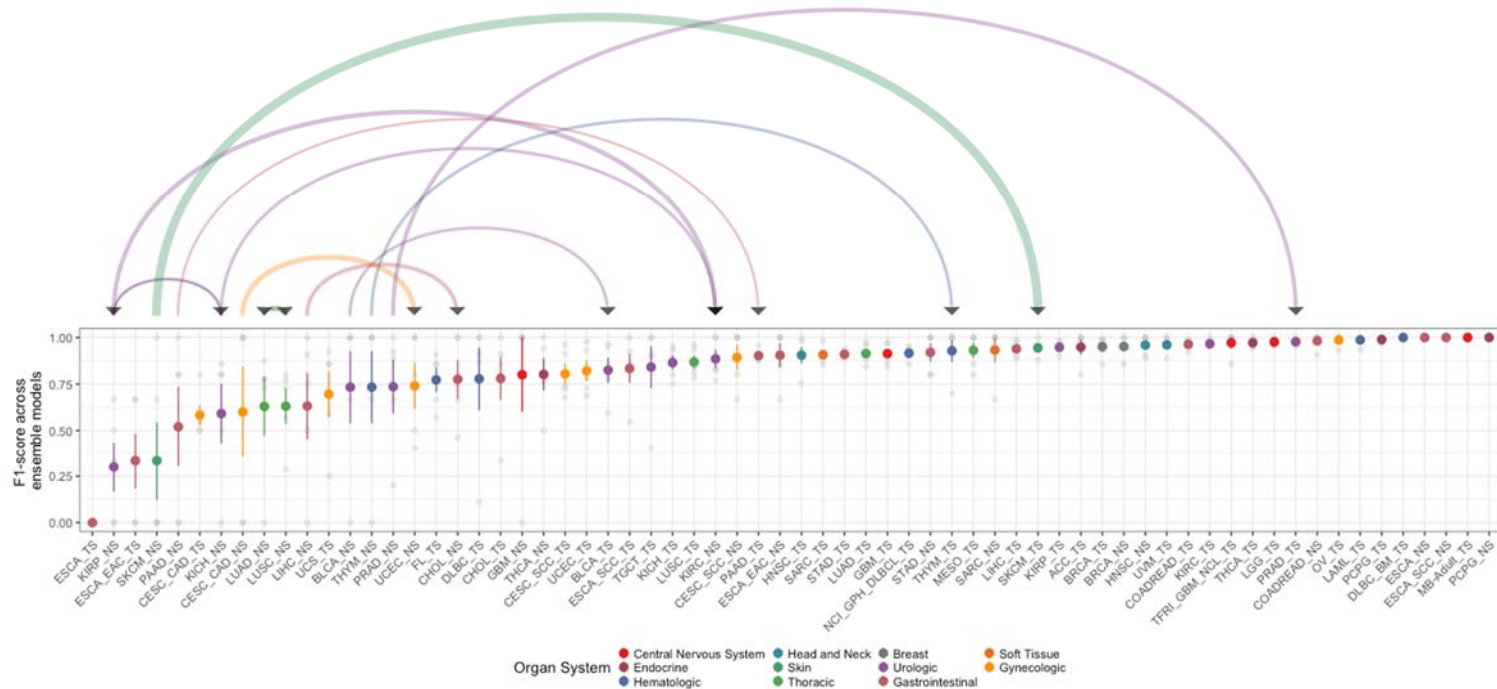



**eFigure 4.** The Performance of Individual Neural Networks on the Held-out Set  
 The SMOTE classifier is the 5<sup>th</sup> (bottom) panel. Class specific performances of each model, ordered by increasing class size, are shown. The names of the models are as defined in eTable 3. For the classes shown on the x-axis, \_TS indicates a tumor class and \_NS indicates a normal class. The performance of each model on each class is shown in grey points, and the line of best fit (loess) shown in blue with grey standard error bounds. Classes are ordered in increasing class size (class size shown in top panel).

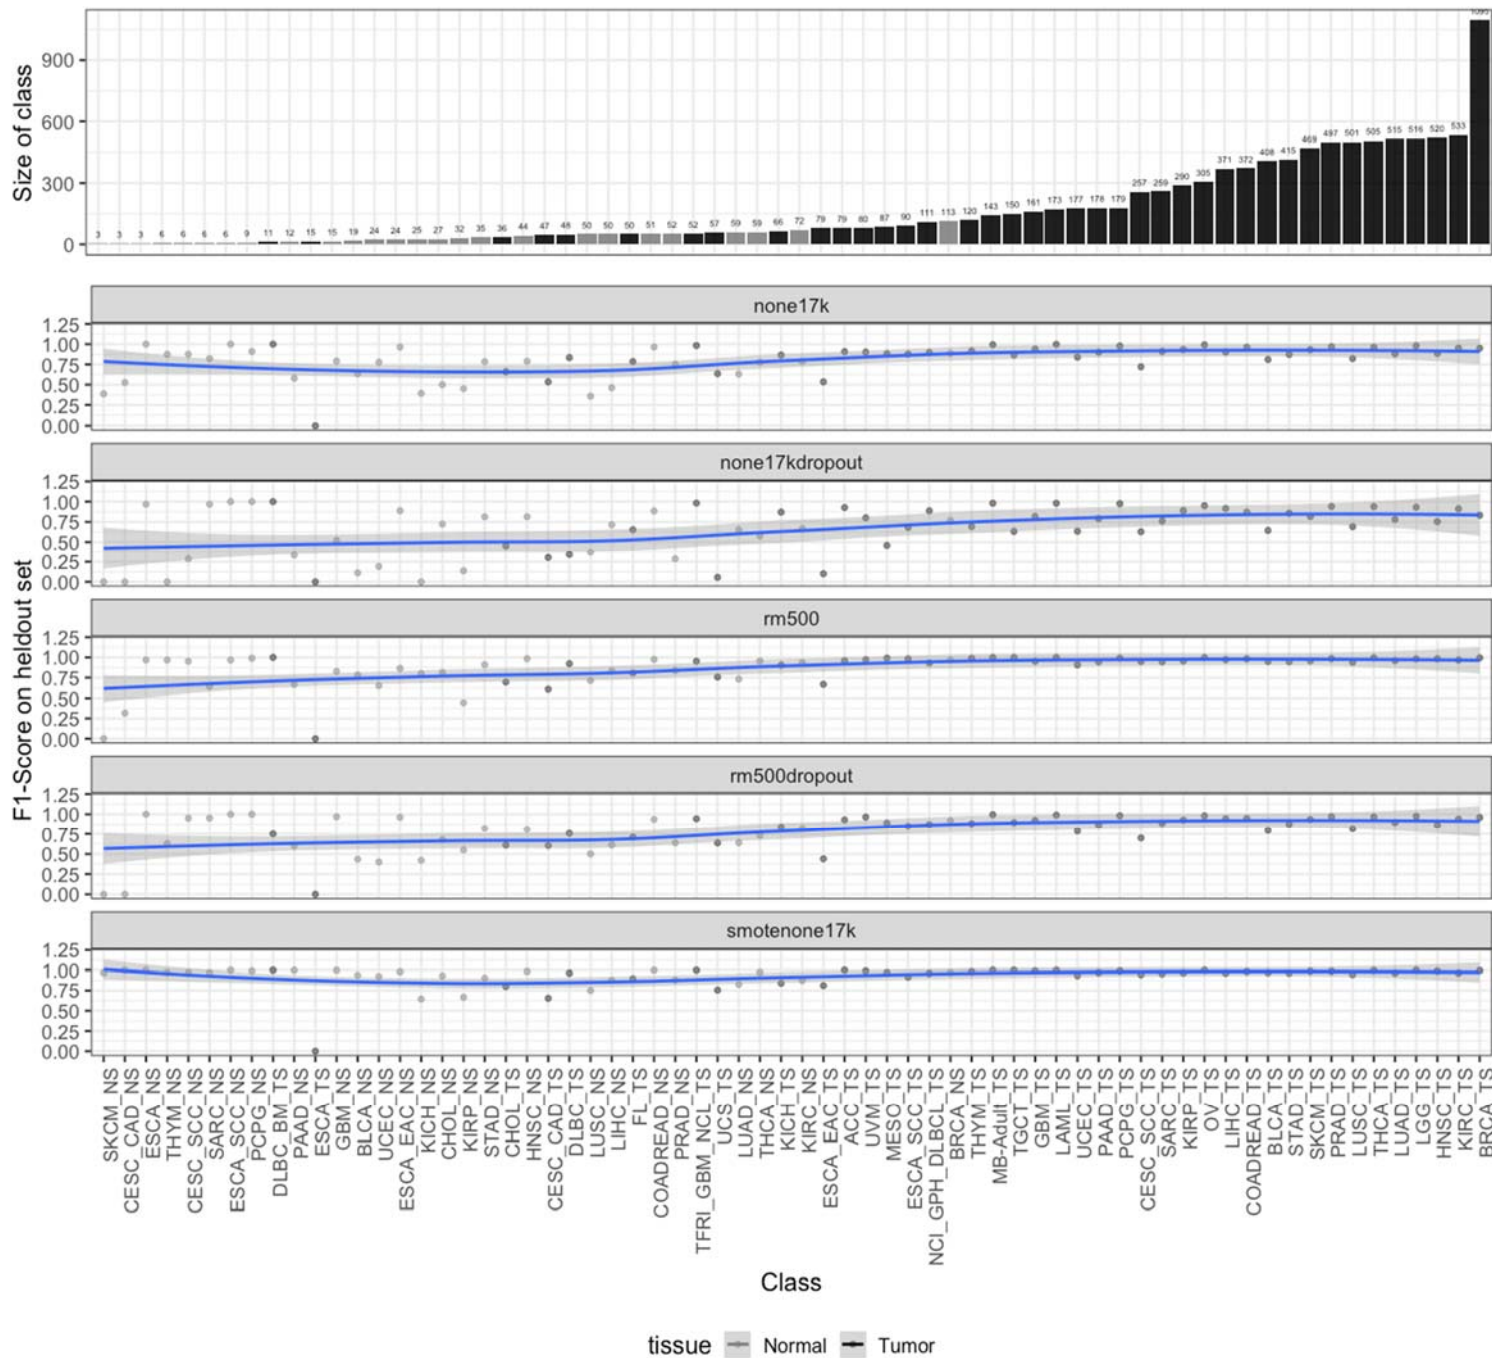

**eFigure 5.** t-SNE Plot of Transcriptomic Data in TCGA Training Cohorts. **All tumour types are shown.**

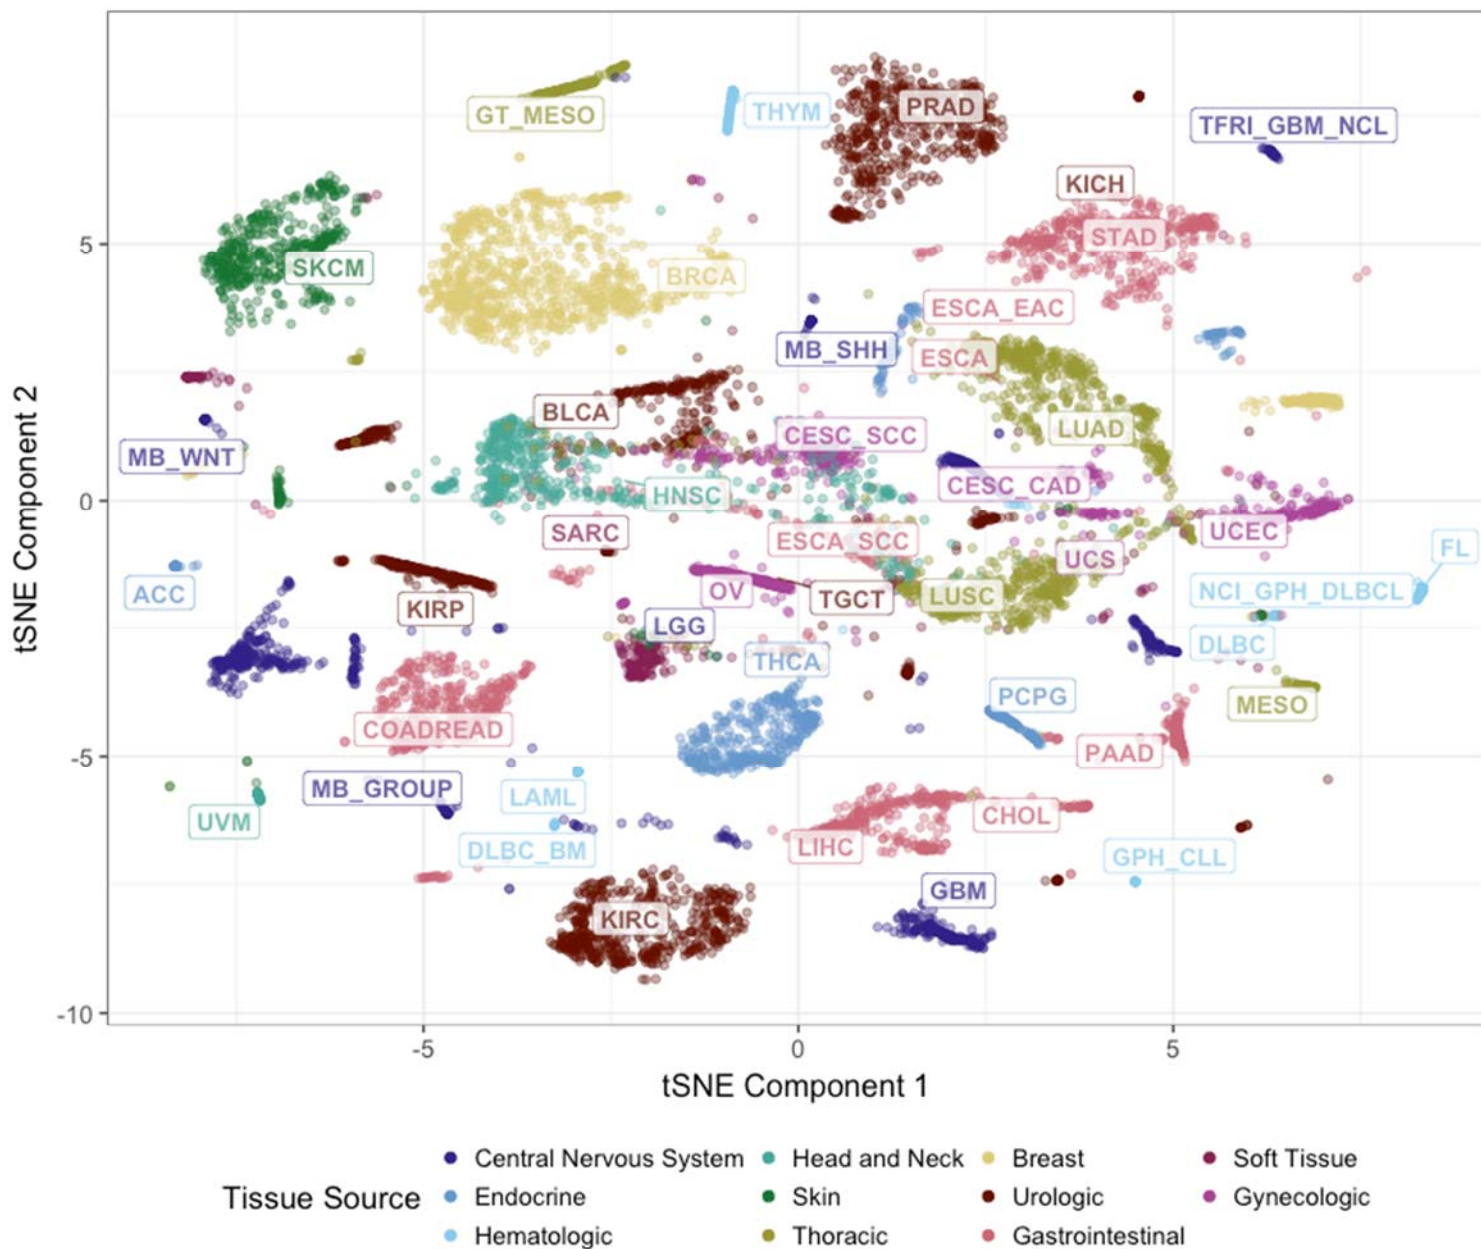

**eFigure 6.** t-SNE Plot of Transcriptomic Data in TCGA Training Cohorts.

Relevant gynecologic and gastrointestinal cancer types are shown.

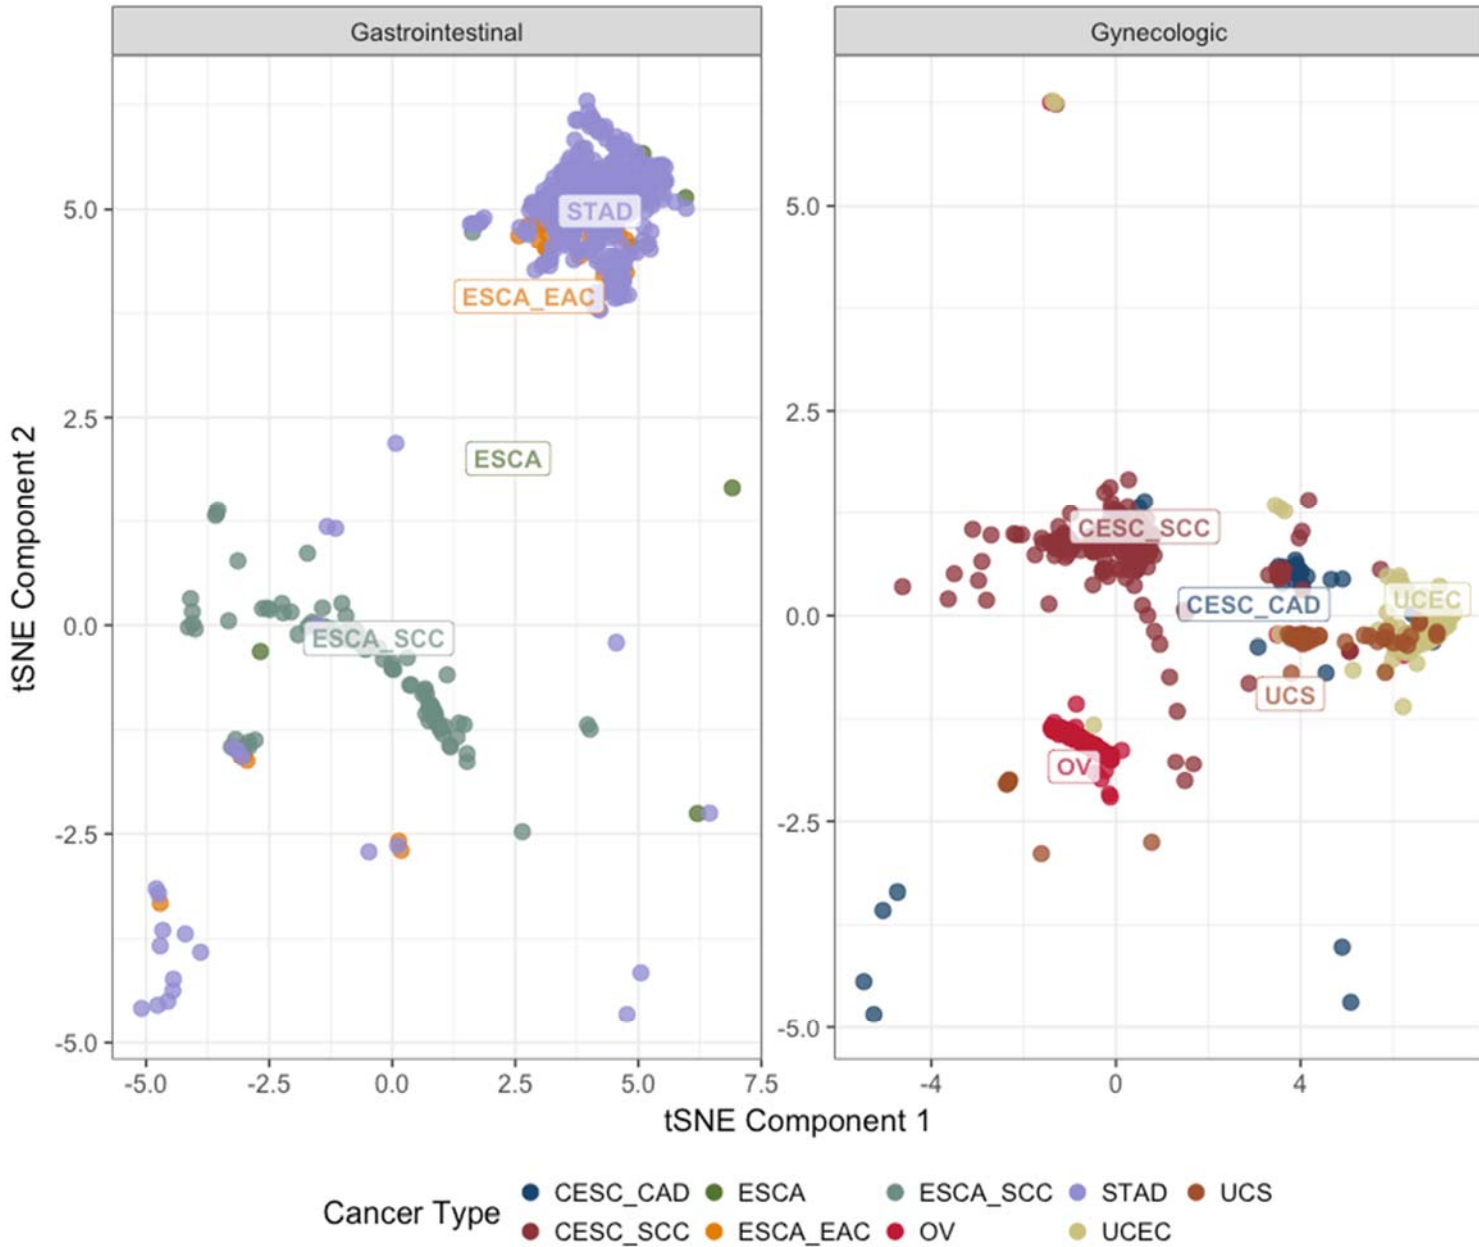

**eFigure 7.** A Detailed Version of Figure 2A, Whereby the Smaller Classes Are Shown Individually Instead of in Aggregate. AC = “Adenocarcinoma”, CA = “Carcinoma”, SCC = “Squamous Cell Carcinoma”, CESC – AC = “Cervical/Endocervical Adenocarcinoma”, UCEC= “Uterine Corpus Endometrial Carcinoma”

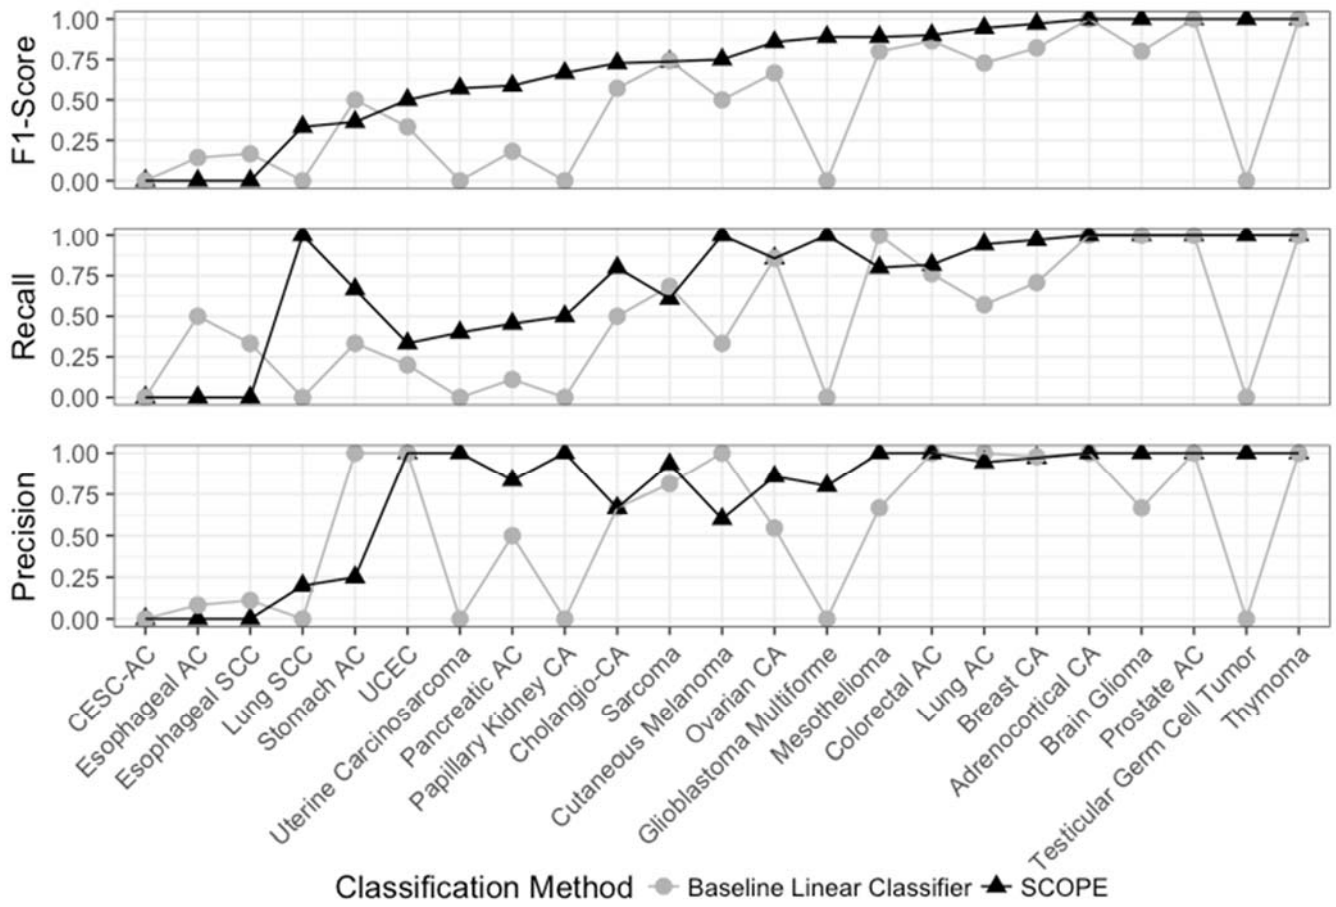

**eFigure 8.** The Distribution of Values for Tests of Association Between Classification Accuracy and a) Tumor Content (%), b) Confidence Score, and c) Training Class Size Are Shown.

A)

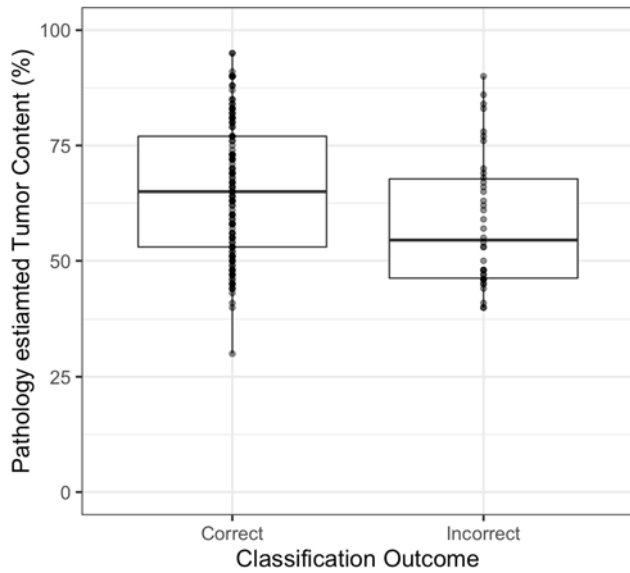

B)

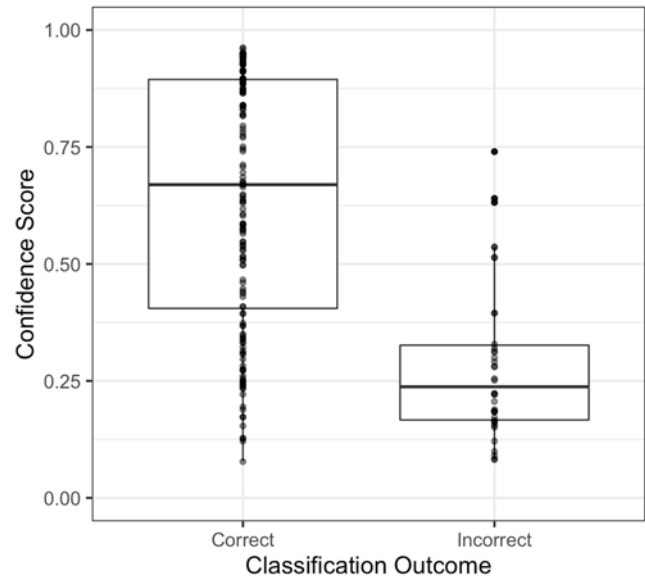

C)

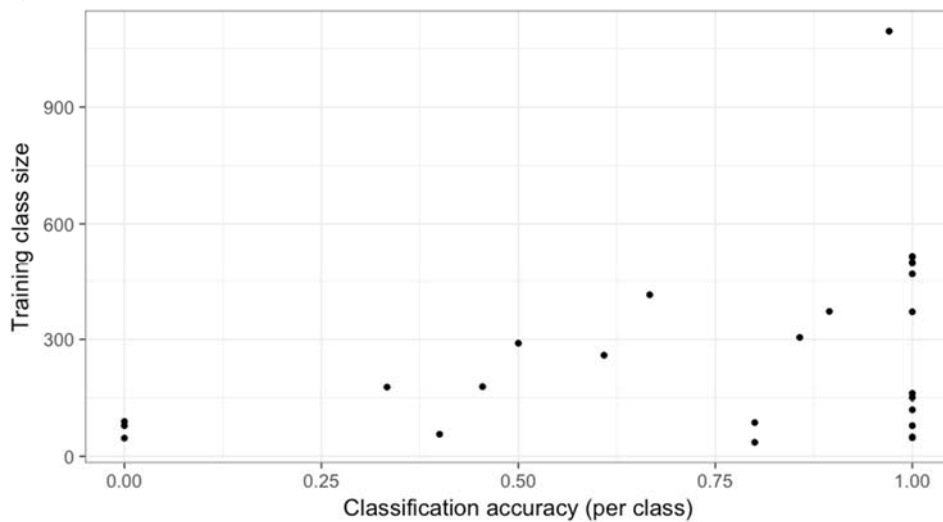

**eFigure 9. Example Outputs From SCOPE** in cases where the tested sample was (a) an epithelioid mesothelioma, correctly identified, (b) sarcomatoid mesothelioma, predicted with split confidence between mesothelioma and sarcoma, (c) a metastatic colorectal cancer, correctly identified, and (d), a metastatic stomach adenocarcinoma biopsied from the liver, incorrectly identified as the site of biopsy. The point colors indicate the Organ System of origin, as shown by the legend.

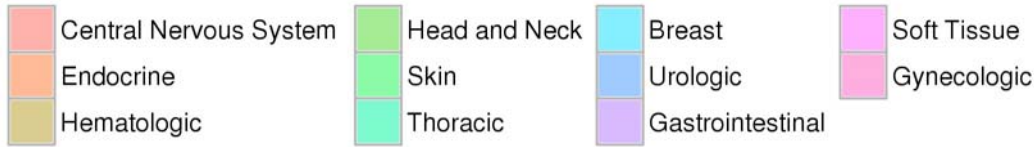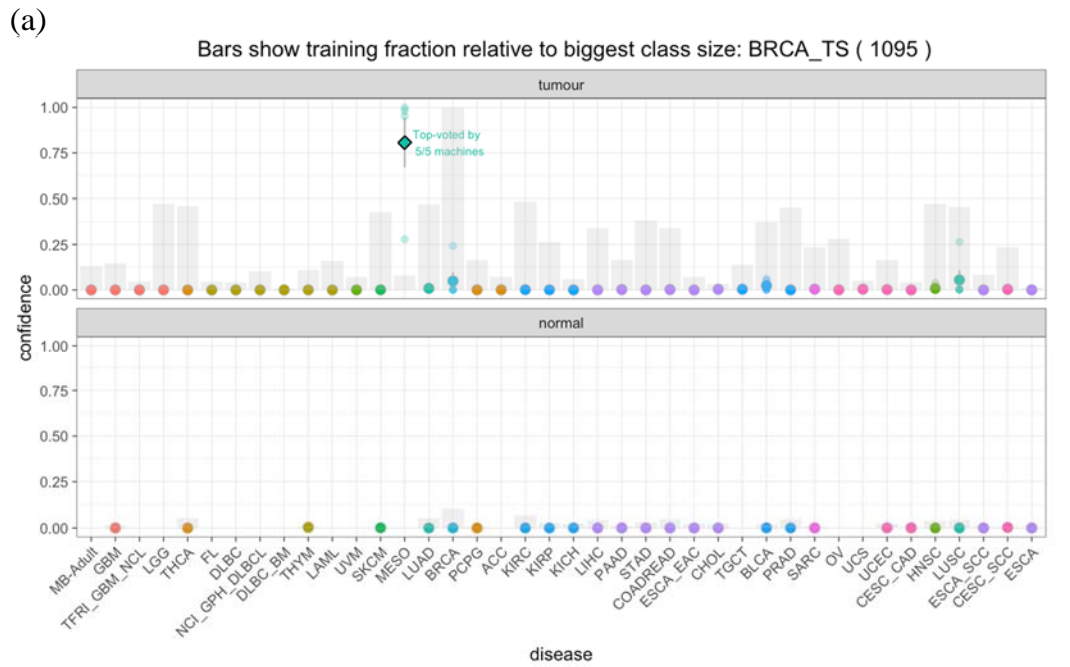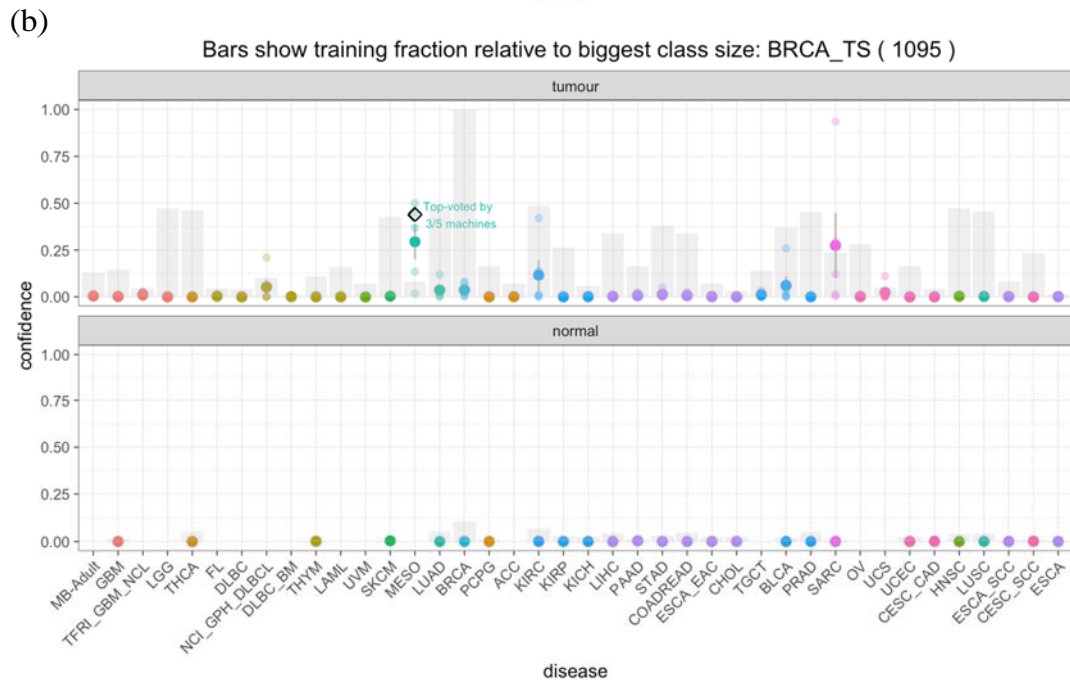

(c)

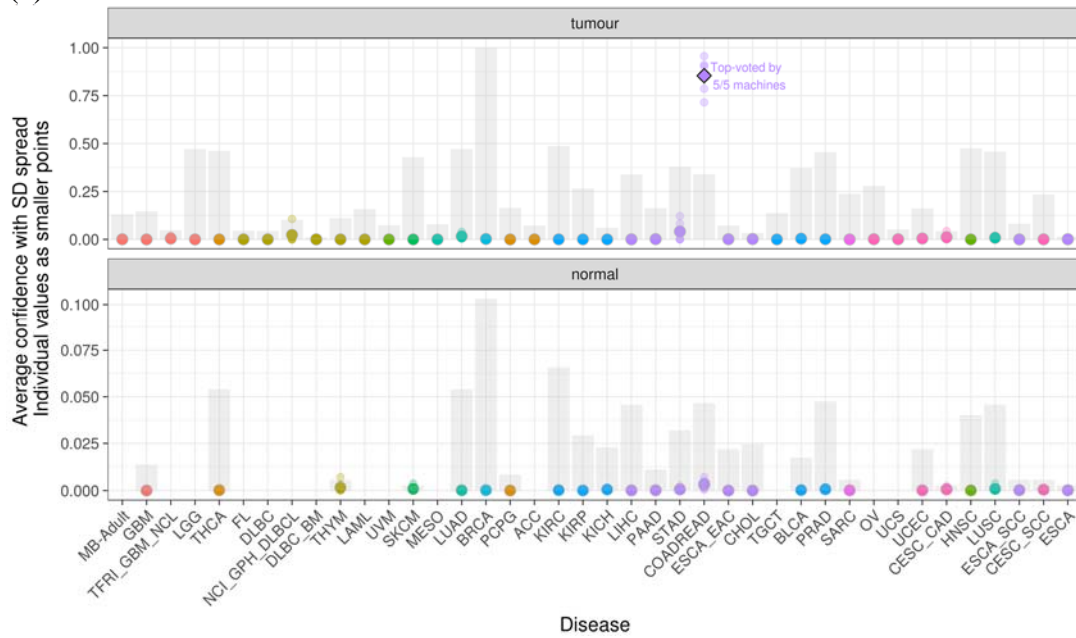

(d)

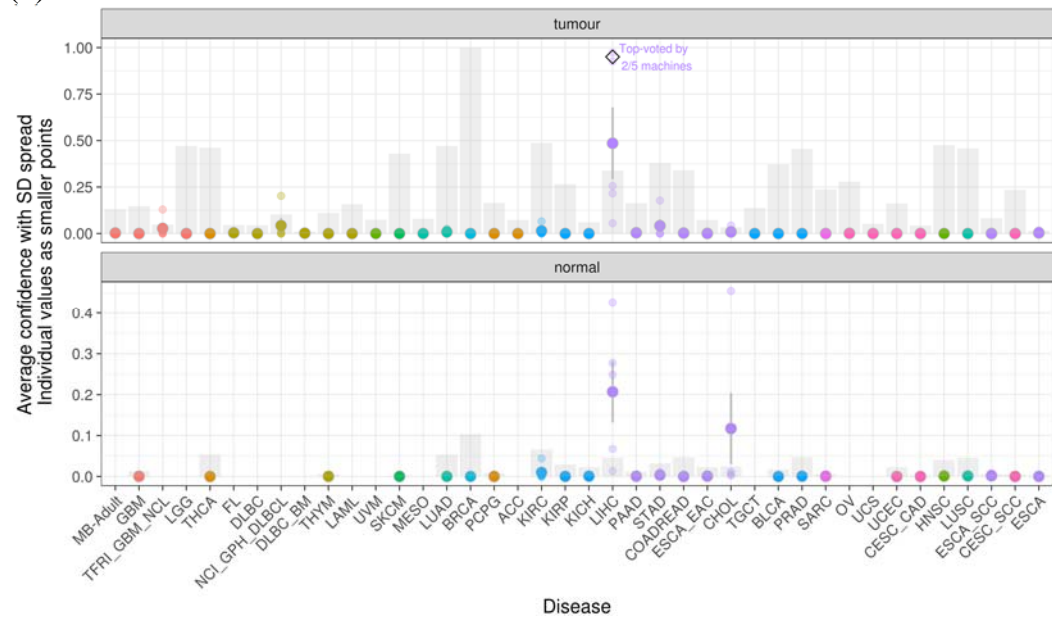

## eReferences

- [1] Morin RD, Johnson NA, Severson TM, et al. Somatic mutations altering EZH2 (Tyr641) in follicular and diffuse large B-cell lymphomas of germinal-center origin. *Nat Genet.* 2010;42(2):181-5.
- [2] Pedregosa F, Varoquaux G. *Scikit-learn: Machine learning in Python*. Vol. 12. 2011, pp. 2825–2830. isbn: 9781783281930. doi: [10 . 1007 / s13398 - 014 - 0173 - 7 . 2](https://doi.org/10.1007/s13398-014-0173-7.2). arXiv: [arXiv : 1201.0490v2](https://arxiv.org/abs/1201.0490v2). url: <http://dl.acm.org/citation.cfm?id=2078195>.
- [3] Bueno R, Stawiski EW, Goldstein LD, et al. Comprehensive genomic analysis of malignant pleural mesothelioma identifies recurrent mutations, gene fusions and splicing alterations. *Nat Genet.* 2016;48(4):407-16.
- [4] Laskin J, Jones S, Aparicio S, et al. Lessons learned from the application of whole-genome analysis to the treatment of patients with advanced cancers. *Cold Spring Harb Mol Case Stud.* 2015;1(1):a000570.
- [5] Chawla N.V., Bowyer K.W., Hall L.O., Kegelmeyer W.P. “SMOTE: Synthetic minority over-sampling technique”. In: *Journal of Artificial Intelligence Research* 16 (2002), pp. 321–357. issn: 10769757. doi: [10.1613/jair.953](https://doi.org/10.1613/jair.953). arXiv: [1106.1813](https://arxiv.org/abs/1106.1813).
- [6] Dieleman S, Schülter J, Raffel C et al. *Lasagne: First release*. Aug. 2015. doi: [10.5281/zenodo.27878](https://doi.org/10.5281/zenodo.27878). url: <http://dx.doi.org/10.5281/zenodo.27878>.
